# Supplementary material
Source: PubMed Central journal article supplement (PMC7549649)
Supplement: KRNB_A_1737443_SM2041.pdf [file KRNB_A_1737443_SM2041.pdf]

## **Supplementary Materials**

### **miR-206 knockout shows it is critical for myogenesis and directly regulates newly identified target mRNAs**

Georgiana M. Salant, Kimngan L. Tat, James A. Goodrich, and Jennifer F. Kugel

Supplemental Figures 1-3

Supplemental Tables 1-3

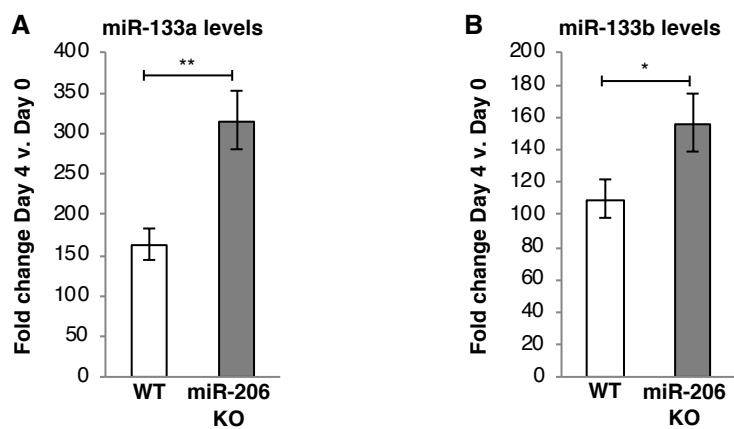

**Supplemental Figure 1. miR-133a/b levels are upregulated after growth in differentiation media in both the WT and miR-206 KO cell lines.** miR-133a (A) and miR-133b (B) expression are induced to a higher level in the miR-206 KO cells compared to WT after four days in differentiation media. Average fold change in miR-133a and miR-133b expression, normalized to control sno202 RNA levels, on Day 4 relative to Day 0 is plotted. The error bars denote the standard deviations (n=3). \* indicates a p-value < 0.05 and \*\* indicates a p-value < 0.01, as determined from an unpaired two-tailed t-test.

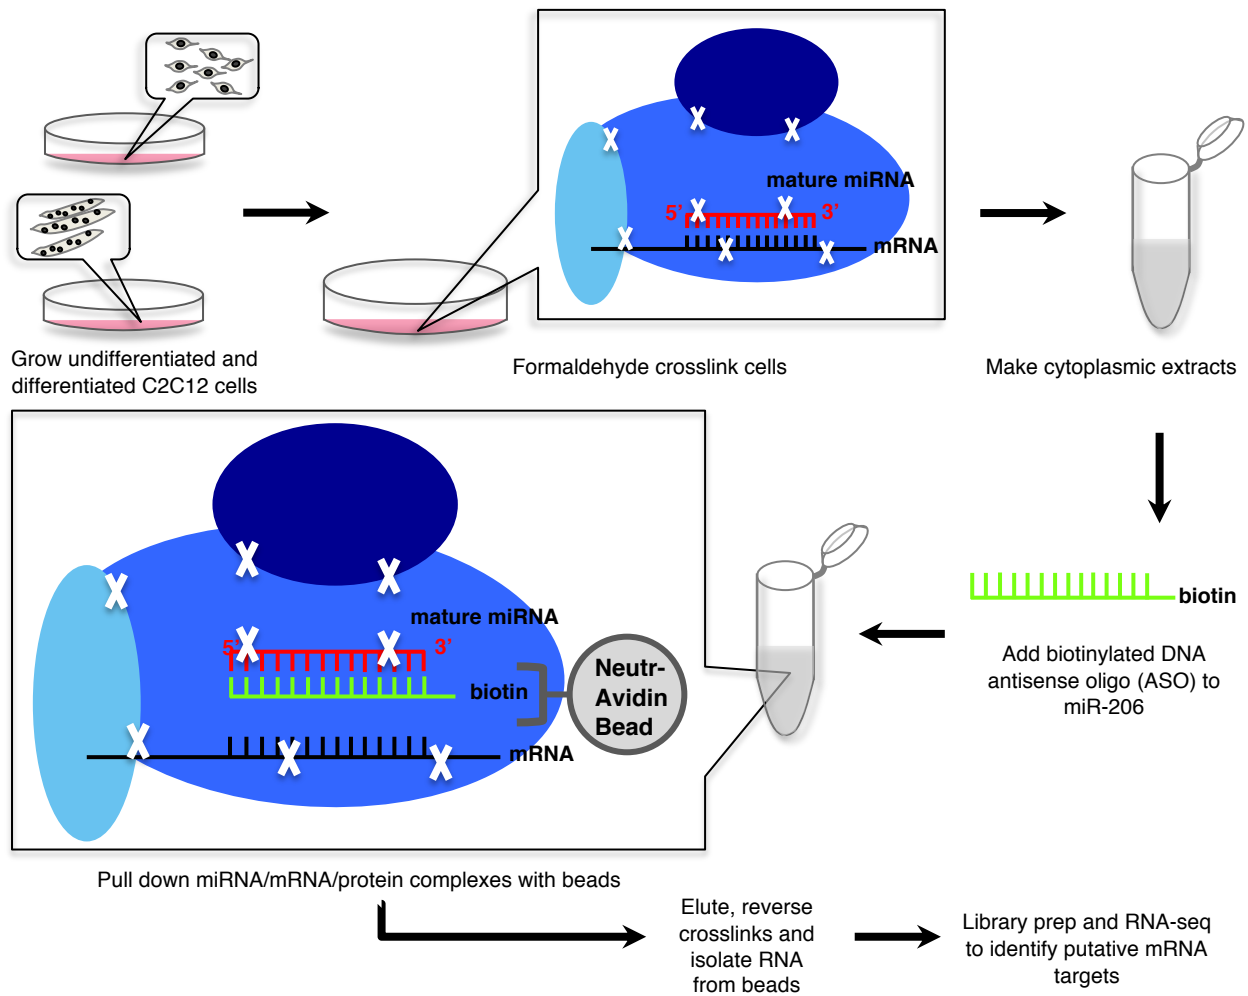

**Supplemental Figure 2. Schematic of xOP-seq method workflow.** We developed/optimized this technique to identify the mRNA targets of a specific miRNA. xOP (crosslinking oligo-purification) is an affinity purification technology using antisense oligos to isolate individual endogenous miRNAs and their associated biomolecules from crosslinked cells (the white X's represent crosslinks). Crosslinking the cells creates a network of protein/RNA interactions that allow us to anneal an antisense oligo to an miRNA under stringent conditions and pull down complexes. Ultimately, mRNAs present in xOP-purified miRNA complexes can be identified using Illumina sequencing.

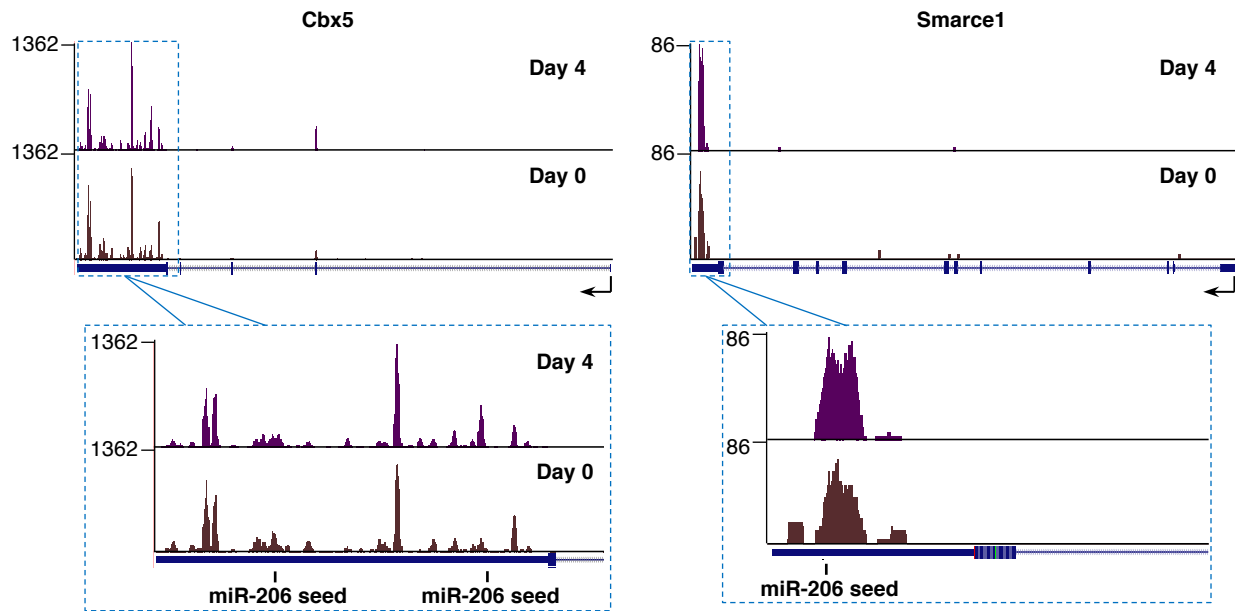

**Supplemental Figure 3.** xOP sequencing tracks for Cbx5 and Smarce1 show mapped reads enriched in the 3'UTRs of the genes. Reads pile up to form peaks over or near miR-206 seed sequences in the 3'UTRs of these genes. Sequencing tracks were created from the UCSC Genome Browser display of bedgraph files from replicate 1 mapped reads.

| Gene name     | Replicate 1 | Replicate 1 | Replicate 2 | Replicate 2 | Gene name    | Replicate 1 | Replicate 1 | Replicate 2 | Replicate 2 |
|---------------|-------------|-------------|-------------|-------------|--------------|-------------|-------------|-------------|-------------|
|               | Day 4       | Day 0       | Day 4       | Day 0       |              | Day 4       | Day 0       | Day 4       | Day 0       |
| A330074K22Rik | 4.9         | 1.3         | 4.7         | 0.0         | Lynx1        | 33.3        | 9.2         | 59.7        | 3.0         |
| Abraxas2      | 57.5        | 17.8        | 68.6        | 29.6        | Map1a        | 52.8        | 18.0        | 57.7        | 14.9        |
| Adam19        | 91.4        | 36.4        | 117.9       | 38.8        | Mapkbp1      | 15.7        | 2.5         | 11.6        | 4.9         |
| Adamts2       | 19.8        | 7.3         | 17.6        | 2.9         | Marc2        | 64.3        | 28.7        | 52.9        | 16.7        |
| Adamts15      | 14.7        | 1.9         | 10.6        | 0.0         | Mef2d        | 61.6        | 14.3        | 69.6        | 20.7        |
| Adcy9         | 10.8        | 1.7         | 8.0         | 2.3         | Mical3       | 8.8         | 0.8         | 13.8        | 1.1         |
| Adgrg6        | 12.3        | 4.6         | 16.8        | 2.4         | Micu2        | 68.3        | 31.6        | 121.5       | 20.6        |
| Agap1         | 20.0        | 4.1         | 22.5        | 9.0         | Mllt11       | 42.7        | 14.3        | 55.6        | 14.5        |
| Apc           | 10.4        | 3.6         | 13.3        | 3.8         | Mlst8        | 7.7         | 1.1         | 6.3         | 1.5         |
| Arhgap23      | 9.8         | 2.0         | 7.5         | 0.0         | Mtf1         | 22.9        | 9.1         | 36.1        | 7.5         |
| Arhgap28      | 10.8        | 1.7         | 11.1        | 0.0         | Mylk4        | 59.2        | 8.3         | 79.8        | 6.2         |
| Arhgap28      | 10.7        | 1.7         | 11.1        | 0.0         | Ndrgr1       | 92.0        | 23.5        | 83.7        | 28.5        |
| Asb1          | 27.1        | 12.7        | 31.6        | 13.7        | Nrbp2        | 8.4         | 3.5         | 9.7         | 2.3         |
| Atf5          | 296.1       | 127.6       | 519.8       | 155.3       | Nsmce2       | 18.7        | 7.3         | 20.2        | 9.5         |
| Atf5          | 168.0       | 74.0        | 269.4       | 88.7        | Nuak1        | 70.0        | 18.7        | 77.1        | 26.7        |
| Atf6          | 90.4        | 25.4        | 113.3       | 30.1        | Patl1        | 5.7         | 1.5         | 5.5         | 0.0         |
| AU040320      | 10.2        | 0.0         | 14.6        | 3.5         | Pbxip1       | 64.0        | 25.0        | 72.5        | 17.1        |
| Bgn           | 451.8       | 189.3       | 522.1       | 176.0       | Pcnx         | 8.4         | 3.3         | 9.1         | 1.4         |
| C1qtnf3       | 40.3        | 8.7         | 61.3        | 4.6         | Pde7a        | 23.7        | 10.9        | 31.8        | 11.3        |
| Camk2a        | 109.7       | 1.5         | 123.8       | 2.0         | Phf8         | 6.2         | 1.1         | 9.9         | 2.8         |
| Camsap1       | 18.2        | 6.3         | 11.6        | 3.5         | Pkp1         | 147.6       | 36.9        | 130.0       | 27.2        |
| Ccbe1         | 3.9         | 0.6         | 7.6         | 3.1         | Pkp1         | 147.4       | 36.9        | 129.8       | 27.1        |
| Ccl9          | 12.2        | 4.2         | 11.7        | 1.4         | Pmaip1       | 6.9         | 2.4         | 24.2        | 4.7         |
| Cdkn1a        | 564.3       | 101.7       | 758.5       | 48.6        | Pnmal2       | 45.7        | 7.4         | 35.7        | 7.8         |
| Cds2          | 40.7        | 15.8        | 36.9        | 15.1        | Popdc3       | 79.8        | 27.7        | 112.3       | 36.2        |
| Cdyl2         | 12.9        | 5.7         | 18.7        | 3.7         | Prkaa2       | 16.7        | 3.2         | 23.8        | 2.6         |
| Chid1         | 5.2         | 0.0         | 8.2         | 2.3         | Pvr          | 6.5         | 1.7         | 12.4        | 2.2         |
| Chrna1        | 71.7        | 15.3        | 76.3        | 14.1        | Qsox1        | 81.4        | 38.5        | 99.4        | 33.5        |
| Cln5          | 34.9        | 16.1        | 37.2        | 15.8        | Rab5b        | 14.9        | 6.6         | 12.3        | 4.3         |
| Cnnm4         | 9.2         | 1.2         | 6.6         | 1.6         | Rassf2       | 17.7        | 4.4         | 19.0        | 2.9         |
| Cnp           | 10.6        | 0.0         | 15.3        | 3.6         | Rgma         | 6.7         | 0.0         | 15.4        | 0.0         |
| Cpeb4         | 64.6        | 24.7        | 83.1        | 16.6        | Rgp1         | 23.8        | 11.2        | 24.0        | 10.8        |
| Csdc2         | 10.5        | 0.0         | 17.2        | 0.0         | Sema6a       | 16.0        | 5.8         | 23.0        | 3.3         |
| Daam2         | 63.9        | 10.4        | 67.1        | 12.2        | Serpinh1a    | 27.5        | 0.0         | 33.1        | 0.0         |
| Dclk1         | 21.6        | 2.4         | 14.4        | 1.3         | Setbp1       | 7.2         | 2.7         | 8.9         | 2.8         |
| Dclk1         | 21.1        | 2.4         | 14.1        | 1.2         | Sft2d2       | 50.9        | 21.7        | 57.6        | 12.5        |
| Dennd5b       | 19.1        | 5.1         | 11.9        | 4.8         | Sh3pxd2a     | 88.1        | 42.7        | 85.2        | 30.9        |
| Dgkd          | 110.3       | 21.9        | 130.9       | 33.7        | Sidt2        | 16.1        | 7.4         | 20.6        | 9.7         |
| Dip2c         | 20.7        | 9.0         | 29.8        | 4.7         | Slc16a2      | 8.6         | 1.1         | 12.3        | 0.0         |
| Dnal1         | 28.3        | 13.2        | 36.6        | 10.0        | Slc39a3      | 11.4        | 3.2         | 13.9        | 0.0         |
| Dnmt3a        | 20.2        | 7.8         | 11.5        | 5.1         | Slc7a5       | 89.8        | 19.2        | 55.8        | 18.0        |
| Drp2          | 23.9        | 11.4        | 29.7        | 11.4        | Sort1        | 24.0        | 0.6         | 19.1        | 0.8         |
| Emp2          | 116.6       | 56.3        | 125.4       | 48.2        | Spg20        | 124.1       | 58.2        | 168.5       | 55.6        |
| Enah          | 40.4        | 12.9        | 48.6        | 14.0        | Srl          | 337.2       | 20.8        | 416.7       | 11.8        |
| Endov         | 12.4        | 3.2         | 9.5         | 3.4         | Srl          | 337.4       | 31.3        | 419.1       | 9.1         |
| Ezh1          | 41.1        | 10.0        | 42.1        | 16.8        | Srr          | 37.5        | 16.0        | 48.7        | 12.0        |
| Fam53b        | 10.5        | 1.5         | 10.8        | 0.0         | Stard5       | 9.9         | 1.5         | 5.5         | 0.0         |
| Fbn1          | 194.1       | 86.5        | 212.9       | 65.1        | Stbd1        | 261.0       | 114.3       | 290.1       | 93.4        |
| Fbxw7         | 15.1        | 1.6         | 11.6        | 4.1         | Stk25        | 13.0        | 3.0         | 5.5         | 2.0         |
| Fem1a         | 30.1        | 11.5        | 32.4        | 9.3         | Stom         | 28.1        | 11.1        | 41.0        | 3.6         |
| Foxj2         | 9.9         | 2.1         | 11.5        | 2.7         | Stx17        | 21.0        | 9.8         | 29.2        | 8.6         |
| Galnt6        | 21.8        | 0.0         | 29.3        | 1.0         | Susd6        | 133.4       | 47.6        | 143.5       | 30.2        |
| Ghitm         | 206.2       | 88.9        | 229.1       | 74.1        | Tceanc2      | 8.3         | 1.0         | 6.2         | 0.0         |
| Gpd1l         | 48.9        | 18.7        | 40.7        | 16.6        | Tex2         | 15.4        | 7.1         | 19.8        | 4.7         |
| Grpel2        | 17.2        | 5.5         | 15.8        | 7.1         | Tmcc3        | 33.1        | 9.3         | 48.9        | 10.4        |
| Gstm2         | 28.8        | 0.0         | 27.7        | 9.8         | Tnfrsf23     | 11.9        | 0.0         | 7.0         | 1.2         |
| Gys1          | 84.0        | 18.7        | 61.4        | 13.6        | Tnfrsf23     | 11.8        | 0.0         | 7.0         | 1.2         |
| H19           | 261.8       | 96.7        | 320.5       | 74.8        | Tnfrsf23     | 11.7        | 0.0         | 6.9         | 1.2         |
| Hdac4         | 11.5        | 4.0         | 15.8        | 5.2         | Tom1l2       | 13.3        | 6.2         | 14.2        | 6.0         |
| Heyl          | 18.5        | 5.6         | 22.2        | 5.2         | Top1         | 28.9        | 12.9        | 55.6        | 25.3        |
| Hif1an        | 63.5        | 23.4        | 65.7        | 20.6        | Tpm2         | 142.4       | 30.8        | 148.7       | 23.2        |
| Hivep2        | 12.2        | 1.6         | 17.5        | 2.1         | Trp53inp2    | 172.7       | 56.2        | 209.0       | 43.4        |
| Igf2          | 272.3       | 26.4        | 341.7       | 12.3        | Ttc9         | 27.1        | 7.9         | 26.7        | 6.9         |
| Igfbp5        | 368.7       | 109.7       | 435.3       | 85.9        | Usp20        | 10.7        | 4.4         | 12.3        | 2.9         |
| Jph2          | 133.7       | 32.4        | 151.2       | 18.2        | Zfp106       | 94.2        | 41.4        | 113.2       | 31.2        |
| Klhl31        | 56.3        | 4.3         | 73.2        | 6.4         | Zfp322a      | 20.1        | 8.0         | 17.8        | 6.3         |
| Ksr1          | 23.7        | 9.5         | 29.7        | 9.9         | Zfp361l      | 24.6        | 10.0        | 18.4        | 7.4         |
| Limd1         | 61.7        | 27.0        | 95.6        | 28.0        | 201011101Rik | 8.7         | 1.9         | 7.2         | 1.7         |
| Lrig2         | 15.2        | 6.9         | 16.5        | 7.2         | 201011101Rik | 18.2        | 7.1         | 21.8        | 0.0         |

**Supplemental Table 1. Putative miR-206 targets identified through xOP-seq.** Shown are the normalized reads per kilobase in the 3'UTR for the 130 putative miR-206 targets identified via xOP-seq. Data for each replicate at Day 0 and Day 4 time points are shown.

| TERM                                             | GENE COUNT | %    | P-value | Benjamini |
|--------------------------------------------------|------------|------|---------|-----------|
| intracellular signaling transduction             | 35         | 26.9 | 6.8E-6  | 1.8E-2    |
| signal transduction                              | 60         | 46.2 | 4.2E-5  | 5.5E-2    |
| signaling                                        | 61         | 46.9 | 1.8E-4  | 9.0E-2    |
| single organism signaling                        | 61         | 46.9 | 1.5E-4  | 9.4E-2    |
| regulation of response to stimulus               | 39         | 30.0 | 2.6E-4  | 9.5E-2    |
| cell communication                               | 61         | 46.9 | 2.4E-4  | 1.0E-1    |
| regulation of cellular protein metabolic process | 30         | 23.1 | 3.6E-4  | 1.0E-1    |
| regulation of molecular function                 | 29         | 22.3 | 4.1E-4  | 1.0E-1    |

**Supplemental Table 2. Eight biological pathways were enriched for the list of 130 putative miR-206 targets identified by xOP-Seq.** Biological pathways (category GOTERM\_BP\_ALL) were identified by DAVID's Functional Annotation tool. Enriched terms had Benjamini-Hochberg corrected p-values  $\leq 0.1$ . Term refers to the enriched biological pathway. Gene count refers to the number of genes out of 130 in each term. Percent (%) refers to the percent of genes out of 130 in term. P-value refers to the uncorrected p-values for each enriched term. Benjamini refers to the Benjamini-Hochberg corrected p-values for each term.

| Gene name | Forward sequence           | Reverse sequence           |
|-----------|----------------------------|----------------------------|
| Adam19    | ACATGACCAGGATGCCACCAAACG   | CACACCTCCAAGCCGACAAGTGC    |
| Bgn       | ATGACTTCAAAGGCCTCCAGCACC   | AGTTTTTGCAGCTCCGCAGAGGGC   |
| Cbx5      | TGTTGGACAGGCGCATGGTTAAGG   | GACAATCCAAGTTCTCTCAGGTTCCC |
| Ccnd1     | GTGCAGAAGGAGATTGTGCCATCC   | GCGGTCCAGGTAGTTCATGGC      |
| Csnk2a2   | GAGCTTGGGCTGCATGTTAGCG     | GTTTCATCTGTCCCCAGAACCTTGGC |
| Gja1      | GTCAACGTGGAGATGCACCTGAAGC  | TGCTGATGATGTAGGTTCTCAGCAGG |
| Hdac4     | CAATGCCAATGCTGTCCACTCCATGG | CTTTTGCGCCTCAATCAGAGAGTGC  |
| Smarce1   | GAAGCCGAGCTCCTTCAGATAGAGG  | GATCTCAGCCGCAATCTTCTCCATG  |
| Spg20     | CTCAACTGTCTGGCAAGGTTGG     | GTAGCTTCTCCTGCGTTGTGCC     |
| Tmcc3     | CAGGCCTATGAGCGCTCAAGG      | TTCACGGCATCCGTCTGCAGG      |

**Supplemental Table 3. qPCR Primers.** Sequences are written 5' to 3'.
